# Supplementary material for: Bifunctional color-tuning luminescent Ln@Zr-MOFs for white LEDs and sensitive, ultrafast detection of nitrobenzene in aqueous media
Source: Royal Society of Chemistry journal article supplement (doi:10.1039/d1tc05243h), 2022-01-01
Supplement: d1tc05243h1.pdf [file d1tc05243h1.pdf]

**Bifunctional color-tuning luminescent Ln@Zr-MOFs for white LEDs  
and sensitive, ultrafast detection of nitrobenzene in aqueous media**

Mengmeng Cao<sup>a</sup>, Chao Xia<sup>b,\*</sup>, Yunpeng Liu<sup>a</sup>, Jinfeng Xia<sup>c</sup>, Danyu Jiang<sup>c</sup>,  
Guohong Zhou<sup>c</sup>, Tongtong Xuan<sup>d,\*</sup>, Huili Li<sup>a,\*</sup>

<sup>a</sup> *Engineering Research Center for Nanophotonics and Advanced Instrument, Ministry of Education, School of Physics and Electronic Science, East China Normal University, Shanghai 200241, China.*

<sup>b</sup> *Guangdong Provincial Key Laboratory of Biomedical Measurements and Ultrasound Imaging, Marshall Laboratory of Biomedical Engineering, School of Biomedical Engineering, Health Science Center, Shenzhen University, Shenzhen 518060, China.*

<sup>c</sup> *Key Laboratory of Transparent Optofunctional Inorganic Materials, Shanghai Institute of Ceramics, Chinese Academy of Sciences, Shanghai 200050, P.R. China.*

<sup>d</sup> *College of Materials, Xiamen University, Xiamen 361005, Fujian, China.*

\*Corresponding authors

E-mail: xiachao927@126.com (Dr. Chao Xia)

E-mail: ttxuan@xmu.edu.cn (Dr. Tongtong Xuan)

E-mail: hlli@phy.ecnu.edu.cn (Prof. Huili Li)

# CONTENTS

## 1. Figures S1–S7

## 2. Tables S1-S2

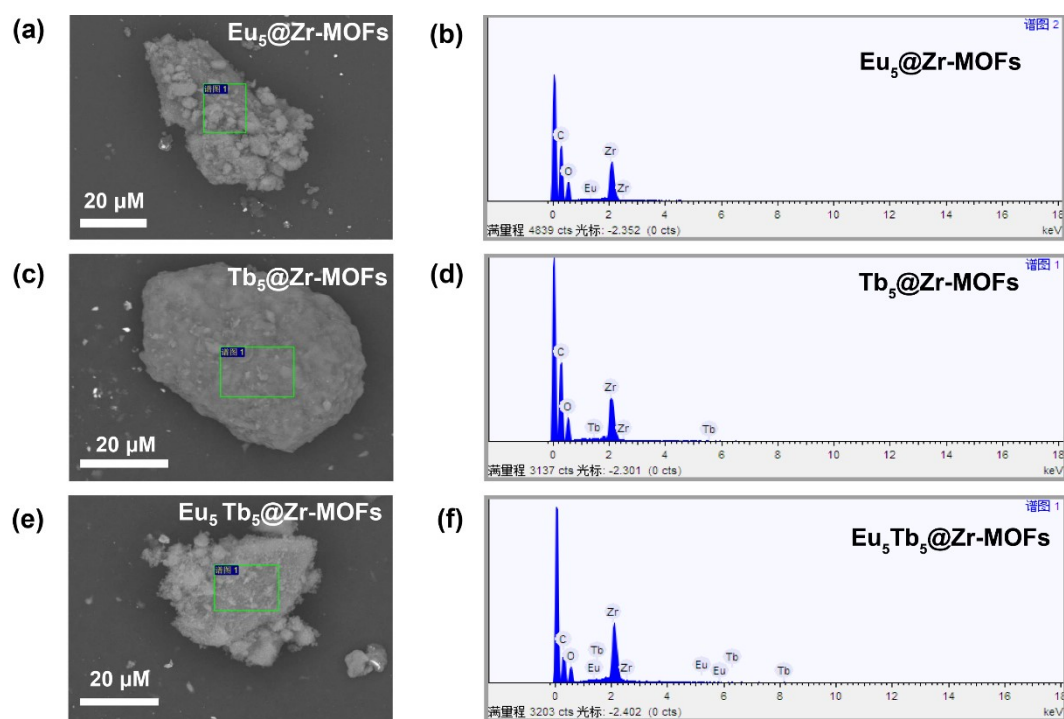

**Figure S1** The SEM images and EDS spectra of  $\text{Eu}_5@Zr\text{-MOFs}$  (a, b),  $\text{Tb}_5@Zr\text{-MOFs}$  (c, d), and  $\text{Eu}_5\text{Tb}_5@Zr\text{-MOFs}$  (e, f).

**Table S1** Every element content in  $\text{Eu}_5@Zr\text{-MOFs}$ ,  $\text{Tb}_5@Zr\text{-MOFs}$  and  $\text{Eu}_5\text{Tb}_5@Zr\text{-MOFs}$  collected from EDS measurement.

|    | $\text{Eu}_5@Zr\text{-MOFs}$ | $\text{Tb}_5@Zr\text{-MOFs}$ | $\text{Eu}_5\text{Tb}_5@Zr\text{-MOFs}$ |
|----|------------------------------|------------------------------|-----------------------------------------|
| C  | 66.83                        | 67.04                        | 71.42                                   |
| O  | 29.55                        | 28.99                        | 24.93                                   |
| Zr | 3.50                         | 3.82                         | 3.38                                    |
| Eu | 0.12                         | 0                            | 0.13                                    |
| Tb | 0                            | 0.15                         | 0.14                                    |

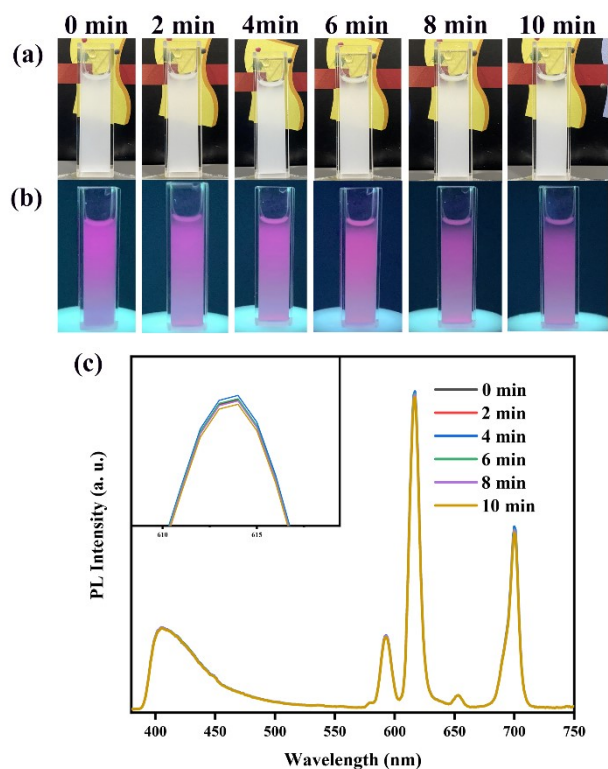

**Figure S2** The photos of  $\text{Eu}_{10}@Zr\text{-MOFs}$  suspension under sunlight (a) and ultraviolet irradiation (b) as well as the corresponding emission spectra

(c) after being placed for different times.

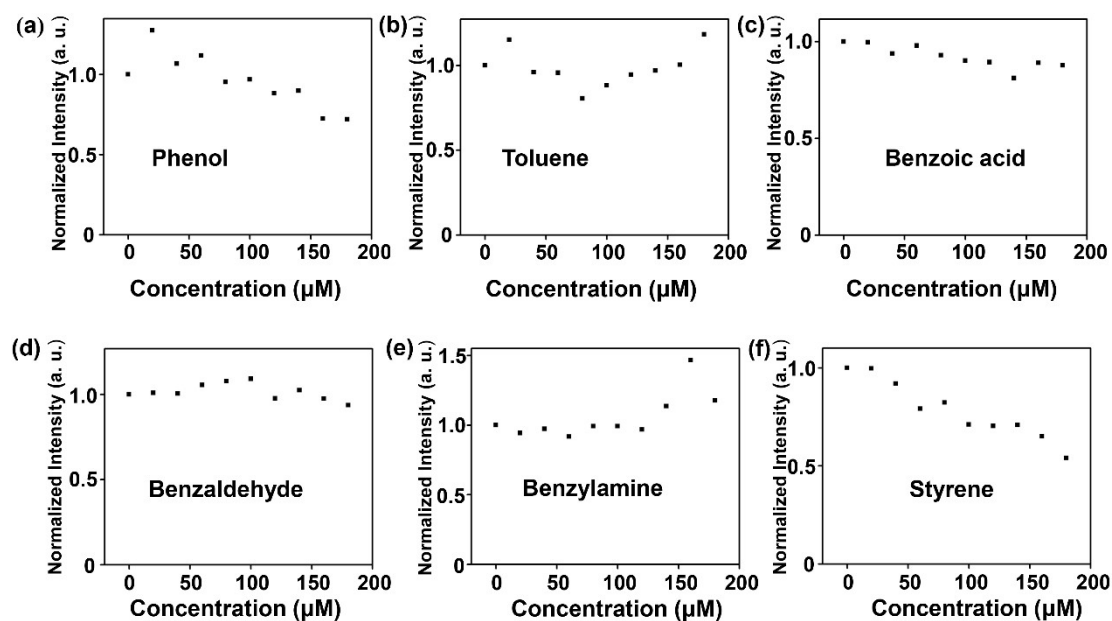

**Figure S3** The variations of PL intensity for  $\text{Eu}_{10}@Zr\text{-MOFs}$  after adding different concentrations of phenol (a), toluene (b), benzoic acid (c), benzaldehyde (d), benzylamine (e), and styrene (f).

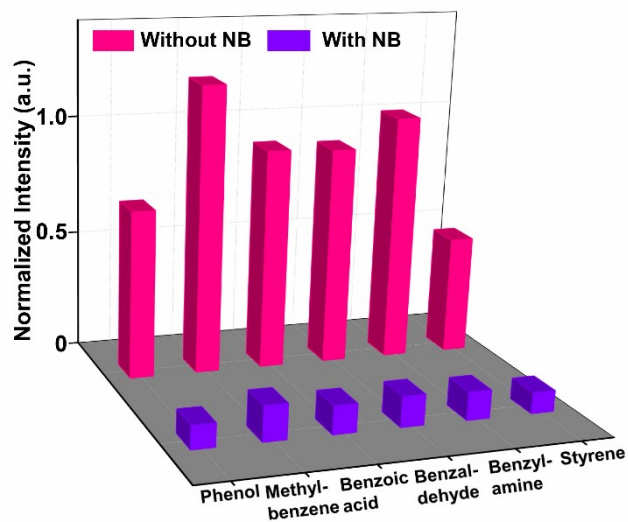

**Figure S4** The luminescence intensity of  $\text{Eu}_{10}@Zr\text{-MOFs}$  suspension after adding other aromatic compounds with or without NB.

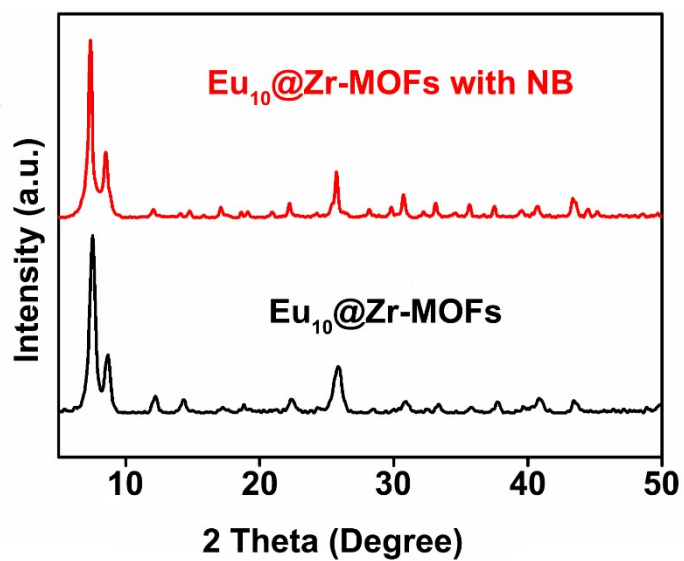

**Figure S5** XRD patterns of Eu<sub>10</sub>@Zr-MOFs before (black line) and after soaked in nitrobenzene solution for one day (red line).

**Table S2** Performances of Ln-MOF probes for sensing NB reported in the literatures.

|                                                          | $K_{sv}$ ( $M^{-1}$ ) | LOD ( $\mu M$ )            | LOQ ( $\mu M$ )            | Refs.     |
|----------------------------------------------------------|-----------------------|----------------------------|----------------------------|-----------|
| $[Eu_3(bpydb)_3(HCOO)(\mu_3-OH)_2(H_2O)]$                | 21000                 | /                          | /                          | [1]       |
| $[Eu(L)1.5]_n$                                           | 62400                 | /                          | /                          | [2]       |
| $\{[Eu_2(NSBPDC)_3(H_2O)_4] \cdot 7(H_2O)\}_n$           | 65512                 | 11.32                      | 37.72                      | [3]       |
| Eu-MOF                                                   | 13260                 | $\sim 27.97$<br>(3.44 ppm) | $\sim 93.22$<br>(11.47ppm) | [4]       |
| $\{[Ln_2(L2)_2(H_2O)_5] \cdot 3H_2O\}_n$ (Nd 1 and Eu 2) | 1323                  | 1.46                       | 4.87                       | [5]       |
| Tb-MOF                                                   | /                     | /                          | /                          | [6]       |
| $Eu_{10}@Zr$ -MOFs                                       | 24459.71              | 1.04                       | 3.48                       | This work |

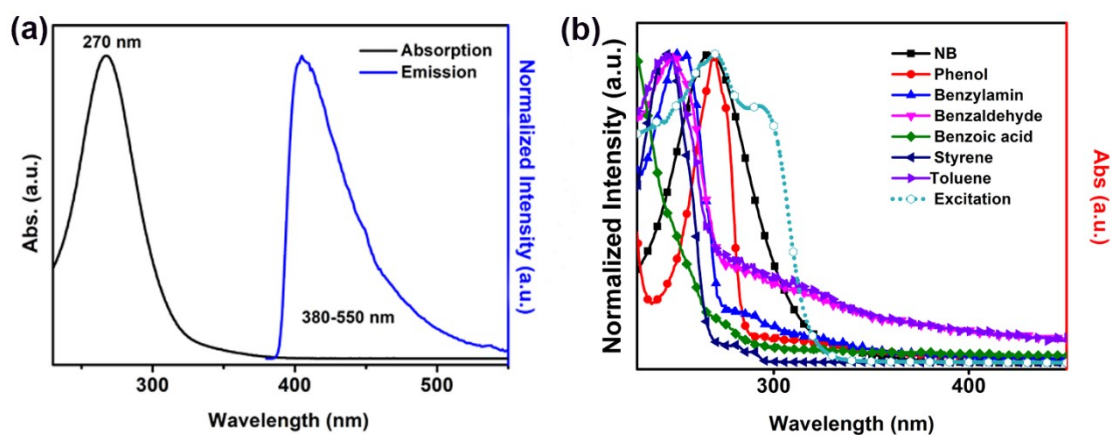

**Figure S6** UV-vis absorption spectrum of NB (black line) and emission spectrum of m-H<sub>2</sub>BDC ligands in Eu<sub>10</sub>@Zr-MOFs (blue line) (a), comparison of UV-vis absorption spectra for phenol, benzene, benzaldehyde, benzoic acid, styrene, toluene and NB with excitation spectrum of Eu<sub>10</sub>@Zr-MOFs (b).

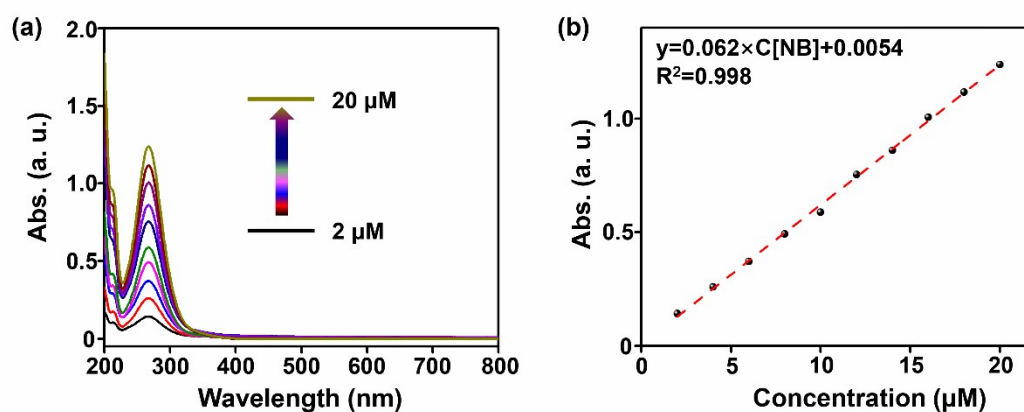

**Figure S7** UV-vis absorption spectra of deionized water solutions doped with 2~20  $\mu$ M NB (a) and the fitted standard curve (b).

## Notes and references

1. X. Z. Song, S. Y. Song, S. N. Zhao, Z. M. Hao, M. Zhu, X. Meng, L. L. Wu and H. J. Zhang, *Adv. Funct. Mater.*, 2014, 24, 4034-4041.
2. S. N. Zhao, X. Z. Song, M. Zhu, X. Meng, L. L. Wu, S. Y. Song, C. Wang and H. J. Zhang, *RSC Adv.*, 2015, 5, 93-98.
3. L. L. Ren, Y. Y. Cui, A. L. Cheng and E. Q. Gao, *J. Solid State Chem.*, 2019, 270, 463-469.
4. K. P. Bai, L. J. Zhou, G. P. Yang, M. X. Cao and Y. Y. Wang, *ChemistrySelect*, 2019, 4, 12794-12800.
5. Z. Sun, J. Sun, L. Xi, J. Xie, X. Wang, Y. Ma and L. Li, *Cryst. Growth Des.*, 2020, 20, 5225-5234.
6. C. H. Zhan, D. P. Huang, Y. Wang, W. T. Mao, X. J. Wang, Z. G. Jiang and Y. L. Feng, *CrystEngComm*, 2021, 23, 2788-2792.
